# Supplementary material for: Context dependent regulatory patterns of the androgen receptor and androgen receptor target genes
Source: BMC Cancer. 2016 Jul 4;16:377. doi: 10.1186/s12885-016-2453-4 (PMC4932678; doi:10.1186/s12885-016-2453-4)
Supplement: Additional file 1: Table S1. — Supernatant PSA assay. Various cell lines were stimulated with different combinations of growth factors and in several co-cultures. Represented here is a selection of these samples. Concentrations: R1881 (10 nm), FGF7 (10 ng/ml), PD98059 MAPKK inhibitor (30 mM), EGF (5 ng/ml) and co-culture with 50-75 % EPT1B8 cells. + denotes added growth factor. Mesenchymal EPT1 cells with p63KD (p63 knockdown), CDH1 or ΔNp63α are described in [14]. (XLS 46 kb) [file 12885_2016_2453_MOESM1_ESM.xls]

## Sheet: Ark1
Supplementary Table 1
Supernatant - PSA assay
Cell line		Stimulation
Monolayer culture	% FCS	R1881	FGF7	MAPKK inh.	EGF	Co-culture	Days	PSA ng/ml
EP156T	1	+					14	0.01
EP156T-p63KD	1	+			+		8	0.011
EP156T-p63KD	1	+		+			8	0.014
EP156T-p63KD	1	+			+	+	8	0.013
EP156T-p63KD	1	+		+		+	8	0.014
EP156T-p63KD	5	+			+	+	8	0.01
EP156T-p63KD	5	+		+		+	8	0.011
LNCaP	10	+					2	128.7
LNCaP	10	+	+				4	407.7
3D-matrigel culture
EP156T	1						14	0.015
EP156T	1	+					14	0.014
EP156T	1	+	+				14	0.016
EPT1	5	+					14	0.013
EPT1-CDH1	5	+					14	0.012
EPT1-ΔNp63α	5	+					14	0.011
EPT1 ΔNp63α+CDH1	5	+					14	0.01
EP156T EPT1-ΔNp63α coculture	3	+					14	0.015
EP156T	5	+				+	10	0.012
EP156T	1	+				+	10	0.012
EPT1B8-ΔNp63α	5	+					8	0.008
EPT1B8	5	+					7	0.008
