# Supplementary material for: Context dependent regulatory patterns of the androgen receptor and androgen receptor target genes
Source: Springer Nature journal article supplement (doi:10.1186/s12885-016-2453-4), 2016-07-04

**a**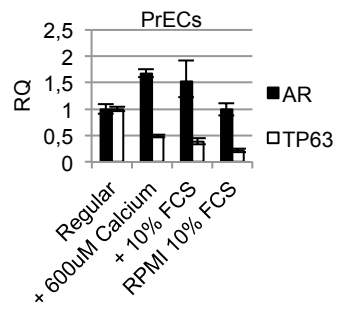**b**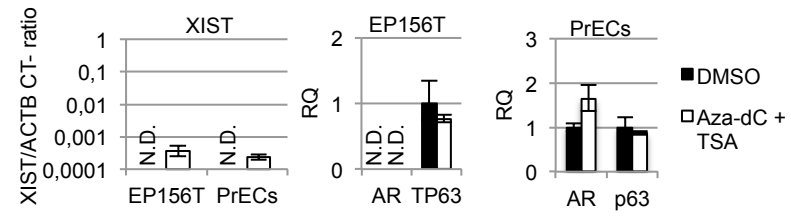

Supplement: MOESM2 [file 10333096]
